# Supplementary material for: Synthesis, characterisation and biological activities of [(p-cym)RuX(pz4lut)]n+ and [{(p-cym)RuX}2(μ-pz4lut)]n+ (X = Cl, H2O and pz4lut = α,α,α′,α′-tetra(pyrazol-1-yl)-2,6-lutidine)
Source: Royal Society of Chemistry journal article supplement (doi:10.1039/c3dt51275d), 2013-01-01

## Supporting Information

**Synthesis, characterisation and biological activities of**  
 **$[(p\text{-cym})\text{RuX}(\text{pz}_4\text{lut})]^{n+}$  and  $\{[(p\text{-cym})\text{RuX}]_2(\mu\text{-pz}_4\text{lut})\}^{n+}$  (X= Cl, H<sub>2</sub>O**  
**and pz<sub>4</sub>lut =  $\alpha,\alpha,\alpha',\alpha'$ -tetra(pyrazol-1-yl)-2,6-lutidine)**

Raj Kiran Surada,<sup>a ‡</sup> Suman Kumar Tripathy,<sup>a ‡</sup> Rajesh K. Manne<sup>b</sup>, Seikh M. Mobin,<sup>c</sup>  
Manas Kumar Santra<sup>\*b</sup> and Srikanta Patra<sup>\*a</sup>

<sup>a</sup>*School of Basic Sciences, Indian Institute of Technology Bhubaneswar, Bhubaneswar, Orissa-751007, India.*

<sup>b</sup>*National Centre for Cell Science, NCCS Complex, Pune University Campus Ganeshkhind, Pune - 411 007, Maharashtra, India.*

<sup>c</sup>*Sophisticated Instrument Centre (SIC), Indian Institute of Technology Indore, Devi Ahilya Vishwavidyalaya Campus, Khandwa Road, Indore – 452017, Madhya Pradesh, India.*

**Fig. S1** Cyclic voltammogram of pz<sub>4</sub>lut ligand in CH<sub>3</sub>CN/0.1mol dm<sup>-3</sup> Et<sub>4</sub>NClO<sub>4</sub> versus Ag/AgCl (scan rate 50mV s<sup>-1</sup>).

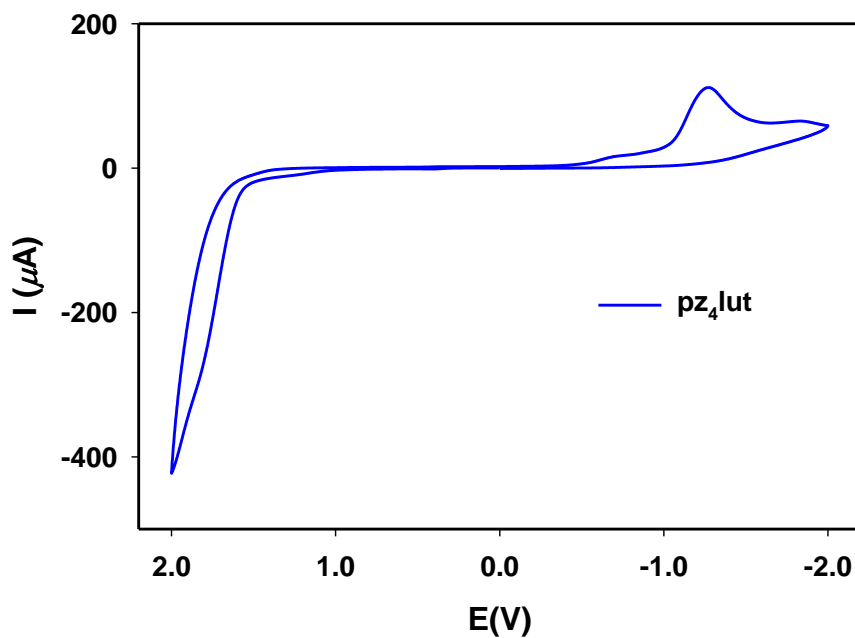

**Fig. S2** Dose dependent suppression of cell viability of (a) pz<sub>4</sub>lut ligand and (b) NaClO<sub>4</sub> in human breast (MCF7), lung (A549) and colon (HCT116) cancer cell lines.

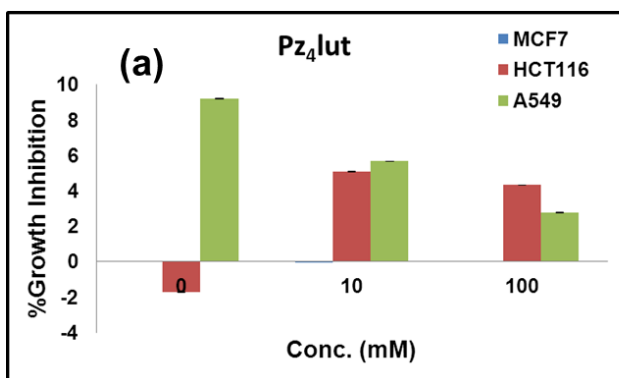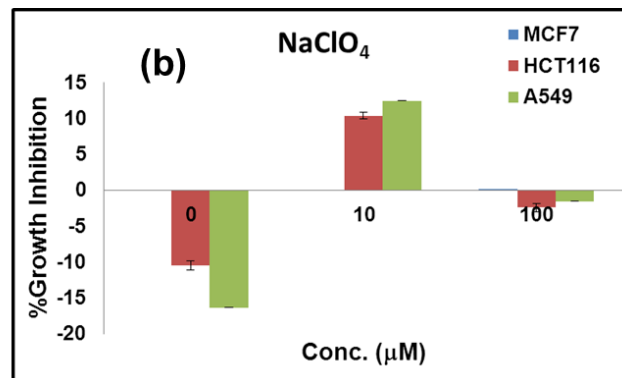

Supplement: c3dt51275d.pdf [file c3dt51275d.pdf]
